# Supplementary material for: Enhancing selectivity for semi-hydrogenation of Ni by periodic isolation in the MM′X structure
Source: Royal Society of Chemistry journal article supplement (doi:10.1039/d3cy00972f), 2023-01-01
Supplement: d3cy00972f1.pdf [file d3cy00972f1.pdf]

## Supporting Information

### Enhancing selectivity for semi-hydrogenation of Ni by periodic isolation in the MM'X structure

Yinglei Liu<sup>a,#</sup>, Changjin Xu<sup>b,#</sup>, Bo Yang<sup>a</sup>, Xiangying Meng<sup>c</sup>, Gaowu Qin<sup>a,d</sup>, Song Li<sup>a,\*</sup>

<sup>a</sup>Key Lab for Anisotropy and Texture of Materials (MoE), School of Materials Science and Engineering, Northeastern University, Shenyang 110819, China

<sup>b</sup>College of Pharmacy, Inner Mongolia Medical University, Hohhot 010110, China

<sup>c</sup>College of Sciences, Northeastern University, Shenyang 110819, China

<sup>d</sup>Institute of Materials Intelligent Technology, Liaoning Academy of Materials, Shenyang 110004, China

\* E-mail: [lis@atm.neu.edu.cn](mailto:lis@atm.neu.edu.cn) (S Li)

## Figures

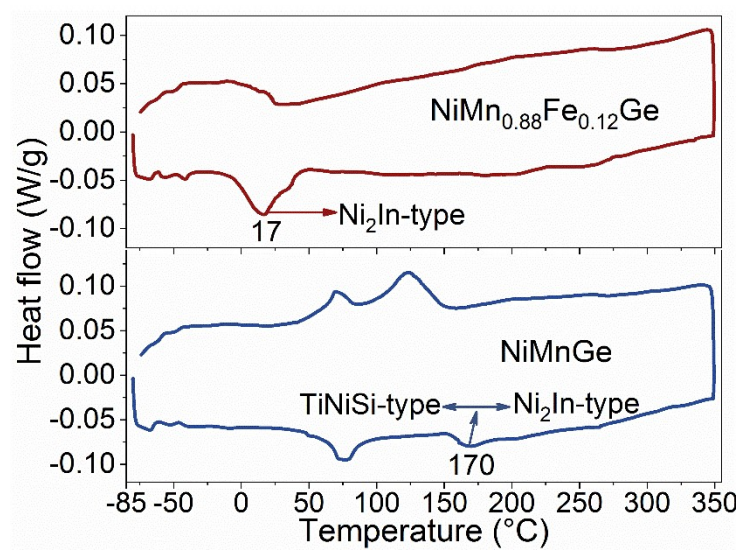

**Fig. S1.** DSC curves for  $\text{NiMnGe}$  and  $\text{NiMn}_{0.88}\text{Fe}_{0.12}\text{Ge}$ .

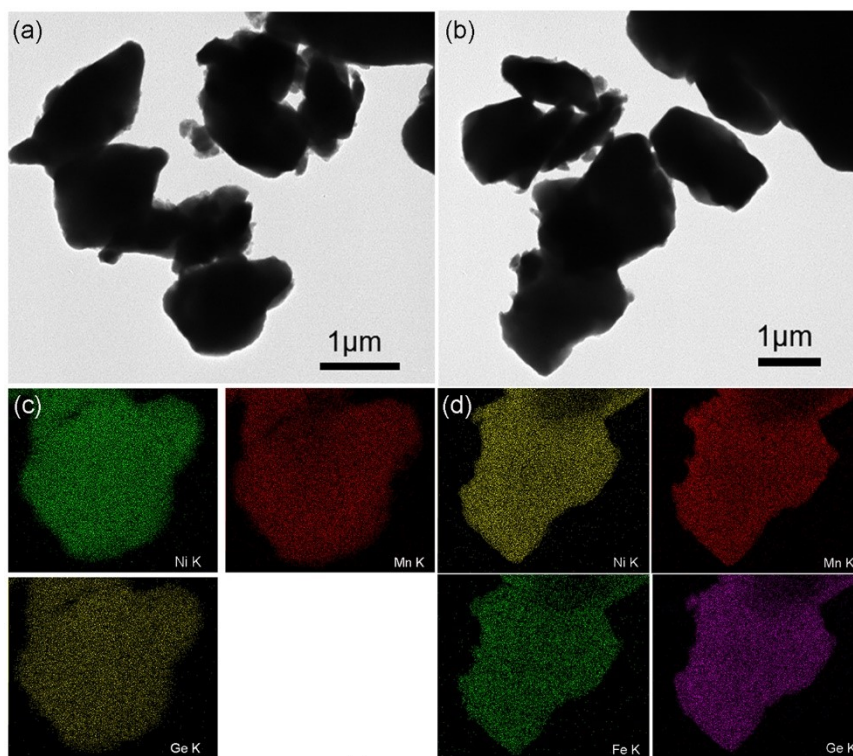

**Fig. S2.** TEM images of the  $\text{NiMnGe}$  (a) and  $\text{NiMn}_{0.88}\text{Fe}_{0.12}\text{Ge}$  (b). The EDS mapping profiles of the  $\text{NiMnGe}$  (c) and  $\text{NiMn}_{0.88}\text{Fe}_{0.12}\text{Ge}$  (d).

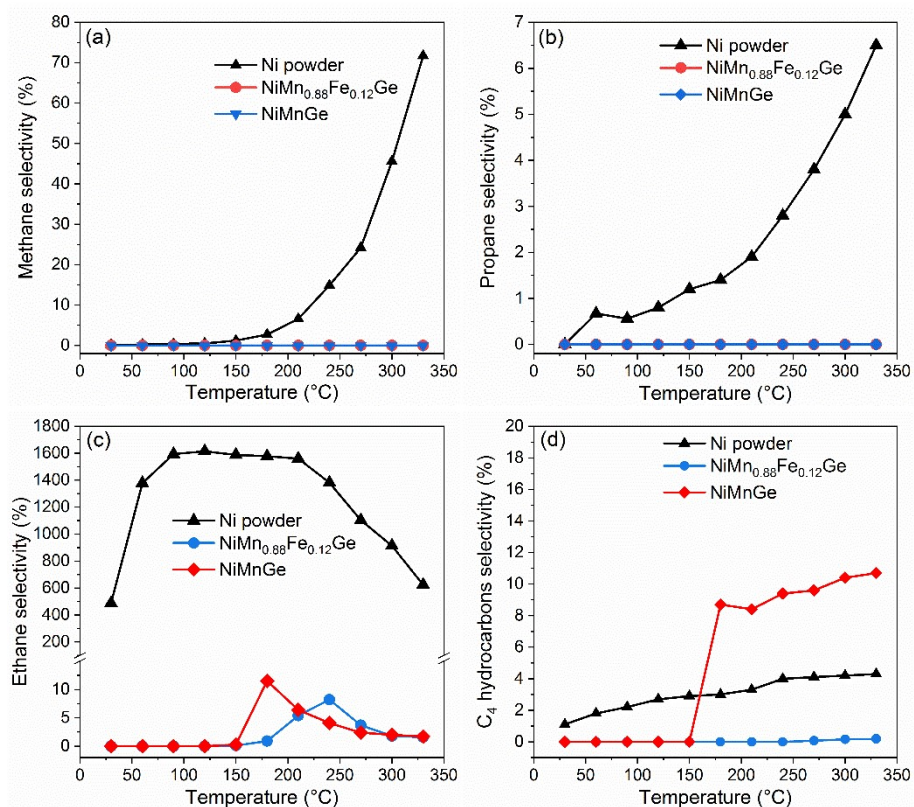

**Fig. S3.** Product selectivity on Ni and MM'X intermetallic compounds. (a) Methane; (b) Propane; (c) Ethane; (d) C<sub>4</sub> hydrocarbons.

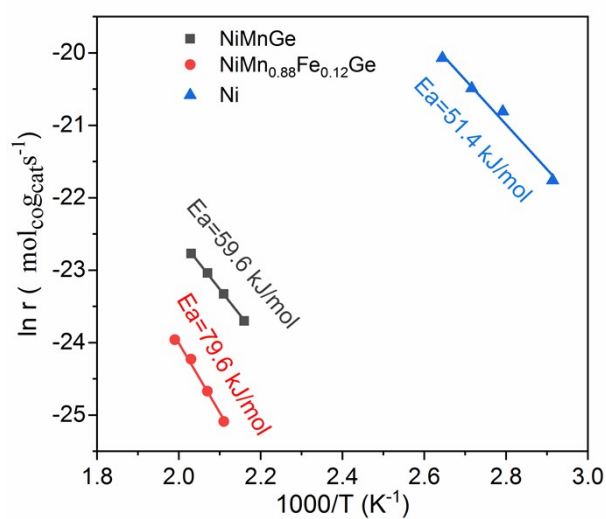

**Fig. S4.** Arrhenius plots over the Ni, NiMnGe, and NiMn<sub>0.88</sub>Fe<sub>0.12</sub>Ge samples.

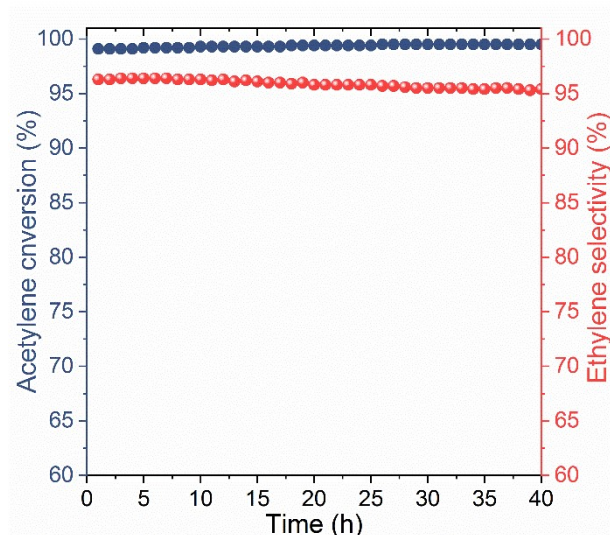

**Fig. S5.** Durability test on  $\text{NiMn}_{0.88}\text{Fe}_{0.12}\text{Ge}$  at  $270^\circ\text{C}$  for 40 h (reaction condition: 1%  $\text{C}_2\text{H}_2$ , 20%  $\text{H}_2$ , 20%  $\text{C}_2\text{H}_4$  gas mix balanced with Ar).

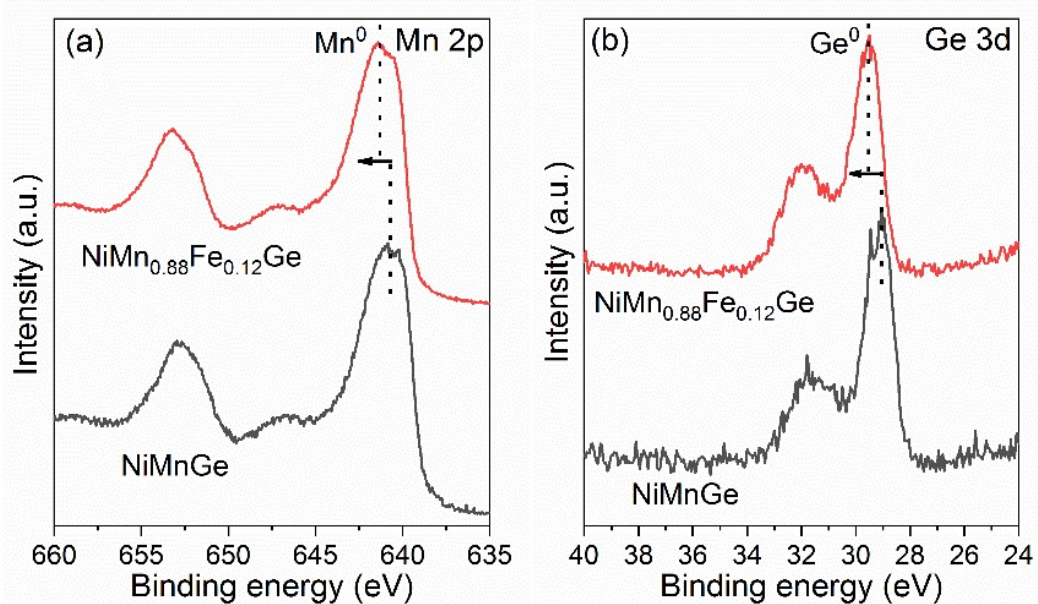

**Fig. S6.** XPS spectra of samples in (a) Mn 2p and (b) Ge 3d regions.

**Table S1** Chemical compositions of the NiMnGe and NiMn<sub>0.88</sub>Fe<sub>0.12</sub>Ge (atom.%) analyzed based on the EDS measurement.

| Samples                                    | Ni<br>(atom%) | Mn<br>(atom%) | Fe<br>(atom%) | Ge<br>(atom%) |
|--------------------------------------------|---------------|---------------|---------------|---------------|
| NiMnGe                                     | 30.56         | 38.13         | --            | 31.31         |
| NiMn <sub>0.88</sub> Fe <sub>0.12</sub> Ge | 32.45         | 28.69         | 5.37          | 33.49         |

**Table S2** Catalysts in Figure 1d.

| Catalysts                                       | Ref | Catalysts                                                          | Ref |
|-------------------------------------------------|-----|--------------------------------------------------------------------|-----|
| PdZn-1.8@ZIF                                    | 1   | Pd-Ag/MgCO <sub>3</sub> @ $\alpha$ -Al <sub>2</sub> O <sub>3</sub> | 2   |
| Co <sub>2</sub> FeGe                            | 3   | Co <sub>2</sub> FeGa <sub>0.25</sub> Ge <sub>0.75</sub>            | 3   |
| CuPd <sub>0.006</sub> /SiO <sub>2</sub>         | 4   | Pd@S-Zn/Co-ZIF                                                     | 5   |
| Pd <sub>1</sub> /C <sub>3</sub> N <sub>4</sub>  | 6   | Pd NPs stabilized by CMC                                           | 7   |
| 0.005% Pd/Ni(OH) <sub>2</sub>                   | 8   | Ni <sub>3</sub> Sn                                                 | 9   |
| Ni <sub>3</sub> Ga-MIHMs                        | 10  | ISA-Pd/MPNC                                                        | 11  |
| PdNPs/ $\alpha$ -Al <sub>2</sub> O <sub>3</sub> | 12  | NiGa                                                               | 13  |
| Na-Ni@CHA                                       | 14  | Pd/CTS                                                             | 15  |
| Ni/g-C <sub>3</sub> N <sub>4</sub> -T           | 16  | 0.05Pd-Cat-100/400                                                 | 17  |
| CN/Ni/Al <sub>2</sub> O <sub>3</sub>            | 18  |                                                                    |     |

## References

- 1 M. Hu, S. Zhao, S. Liu, C. Chen, W. Chen, W. Zhu, C. Liang, W.-C. Cheong, Y. Wang, Y. Yu, Q. Peng, K. Zhou, J. Li and Y. Li, *Adv. Mater.*, 2018, **30**, 1801878.
- 2 C. Che, B. Wang, C. Shan, H. Chen, W. Liu and Y. Tang, *Catal. Letters*, 2017, **147**, 483–490.
- 3 T. Kojima, S. Kameoka, S. Fujii, S. Ueda and A. P. Tsai, *Sci. Adv.*, 2018, **4**, eaat6063.
- 4 G. X. Pei, X. Y. Liu, X. Yang, L. Zhang, A. Wang, L. Li, H. Wang, X. Wang and T. Zhang, *ACS Catal.*, 2017, **7**, 1491–1500.
- 5 J. Yang, F. Zhang, H. Lu, X. Hong, H. Jiang, Y. Wu and Y. Li, *Angew. Chem. Int. Ed.*, 2015, **54**, 10889–10893.
- 6 X. Huang, Y. Xia, Y. Cao, X. Zheng, H. Pan, J. Zhu, C. Ma, H. Wang, J. Li, R. You, S. Wei, W. Huang and J. Lu, *Nano Res.*, 2017, **10**, 1302–1312.
- 7 H. Zhang, Y. Yang, W. Dai, D. Yang, S. Lu and Y. Ji, *Catal. Sci. Technol.*, 2012, **2**, 1319–1323.
- 8 M. Hu, J. Zhang, W. Zhu, Z. Chen, X. Gao, X. Du, J. Wan, K. Zhou, C. Chen and Y. Li, *Nano Res.*, 2018, **11**, 905–912.

- 9 Y. Liu, X. Liu, Q. Feng, D. He, L. Zhang, C. Lian, R. Shen, G. Zhao, Y. Ji, D. Wang, G. Zhou and Y. Li, *Adv. Mater.*, 2016, **28**, 4747–4754.
- 10 M. Hu, W. Yang, S. Liu, W. Zhu, Y. Li, B. Hu, Z. Chen, R. Shen, W. C. Cheong, Y. Wang, K. Zhou, Q. Peng, C. Chen and Y. Li, *Chem. Sci.*, 2019, **10**, 614–619.
- 11 Q. Feng, S. Zhao, Q. Xu, W. Chen, S. Tian, Y. Wang, W. Yan, J. Luo, D. Wang and Y. Li, *Adv. Mater.*, 2019, **31**, 1901024.
- 12 H. Zhang, Y. Wang, Y. Wang, J. Cao, P. Kang, Q. Tang and M. Ma, *Catalysts*, 2017, **7**, 128.
- 13 Y. Cao, H. Zhang, S. Ji, Z. Sui, Z. Jiang, D. Wang, F. Zaera, X. Zhou, X. Duan and Y. Li, *Angew. Chem. Int. Ed.*, 2020, **59**, 11647–11652.
- 14 Y. Chai, G. Wu, X. Liu, Y. Ren, W. Dai, C. Wang, Z. Xie, N. Guan and L. Li, *J. Am. Chem. Soc.*, 2019, **141**, 9920–9927.
- 15 Q. Guan, C. Yang, S. Wang, L. He, Z. Kong, X. Chai, H. Xin and P. Ning, *ACS Catal.*, 2019, **9**, 11146–11152.
- 16 H. Zhou, B. Li, H. Fu, X. Zhao, M. Zhang, X. Wang, Y. Liu, Z. Yang and X. Lou, *ACS Sustain. Chem. Eng.*, 2022, **10**, 4849–4861.
- 17 S. Wang, G. Zhao, Y. Liu and Y. Lu, *Ind. Eng. Chem. Res.*, 2019, **58**, 16431–16441.
- 18 T. Fu, T. Wang, H. Sun, Y. Xu, Z. Dong, X. Guo, L. Peng, Y. Zhu, Z. Chen and W. Ding, *Sci. China Chem.*, 2018, **61**, 1014–1019.
